CORRECTION

## Correction: Estimation of cervicocephalic kinesthetic perception and its correlation with fall risk in adults with diabetes and without diabetes experiencing cervical pain: A comparative study

Shilpi Anand, Divya Aggarwal, Sahar Zaidi, Himani Kaushik, Irshad Ahmad, Debjani Mukherjee, Ghada Mohammed Koura, Emadeldin Mohammed Mukhtar, Nasrin Mansuri, Fuzail Ahmad, Ravi Shankar Reddy, Muhammad Sufyan

There is an error in affiliation 9 for author Fuzail Ahmad. The correct affiliation 9 is: Respiratory Care Department, College of Applied Sciences, Almareefa University, Diriyah, Riyadh, Saudi Arabia.

The following information is missing from the Acknowledgement statement: Fuzail Ahmad would like to thank AlMaarefa University, Diriyah, Riyadh, Saudi Arabia for supporting this research.

### Reference

1. Anand S, Aggarwal D, Zaidi S, Kaushik H, Ahmad I, Mukherjee D, et al. Estimation of cervicocephalic kinesthetic perception and its correlation with fall risk in adults with diabetes and without diabetes experiencing cervical pain: a comparative study. PLoS One. 2025;20(6):e0323457. <https://doi.org/10.1371/journal.pone.0323457> PMID: [40504812](https://pubmed.ncbi.nlm.nih.gov/40504812/)

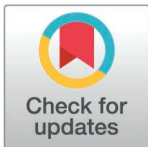

### OPEN ACCESS

**Citation:** Anand S, Aggarwal D, Zaidi S, Kaushik H, Ahmad I, Mukherjee D, et al. (2026) Correction: Estimation of cervicocephalic kinesthetic perception and its correlation with fall risk in adults with diabetes and without diabetes experiencing cervical pain: A comparative study. PLoS One 21(3): e0344597. <https://doi.org/10.1371/journal.pone.0344597>

**Published:** March 9, 2026

**Copyright:** © 2026 Anand et al. This is an open access article distributed under the terms of the [Creative Commons Attribution License](https://creativecommons.org/licenses/by/4.0/), which permits unrestricted use, distribution, and reproduction in any medium, provided the original author and source are credited.
